# Supplementary material
Source: publisher site journal article supplement (https://www.dovepress.com/get_supplementary_file.php?f=242191.docx)
Supplement: Supplementary file 1 [file get_supplementary_file.php]

**Supplementary tables**

**Supplementary Table 1** Inclusion and Exclusion Criteria

| **Inclusion criteria** | **Exclusion criteria** |
| --- | --- |
| - Male or female sex, age between ≥ 40 and ≤ 85 years old. - Documented diagnosis of COPD with GOLD 2 to 4 severity according to the GOLD guidelines. - Cooperative attitude and ability to be trained  to correctly use the Aerobika® device. - Utilization of a contraception method at least 14 days before the beginning of the study and throughout its duration (female subjects of child-bearing potential). - Ability to produce sputum (defined as productive cough with sputum “several days a week” (>2 days a week) or “almost every day” in the month prior to the study). - Standard of care treatment (in accordance with the GOLD guidelines) in a stable dose for at least one week before the onset of the experimental period. - Ability to understand and complete the protocol requirements, instructions and protocol-stated restrictions. - Unchanged smoking status within three months of study onset and throughout the study period. | - Pregnancy or lactation. - Upper or lower airway infection unresolved within four weeks of the study screening. - Occurrence of an exacerbation (defined as an acute change in the patient’s baseline dyspnea, cough, and/or sputum that is beyond normal day to day variations and necessitates the administration or doubling of systemic corticosteroid treatment) within four weeks of the study screening. - Unability to tolerate the increased work of breathing. - Clinical history of cerebrovascular diseases or esophageal surgery. - Clinically-significant hemodynamic instability. - Recent facial, oral or skull surgery or trauma. - Active acute sinusitis, epistaxis, hemoptysis or asthma. - Active diagnosis of nausea at study onset. - Untreated pneumothorax. - Known or suspected tympanic membrane rupture or other middle ear pathology. - Active cancer or any other chronic disease with poor prognosis and/or affecting patient status. - Major surgery within 12 weeks of study onset or planned to before the end of the study. - Any uncontrolled disease or condition that might, in the judgement of the investigator, place the patient at undue risk or potentially compromise the results or interpretation of the study. - Reception of an investigational drug within four weeks of study onset or twice the duration of the biological effect of the drug (whichever is longer). - Inability to perform pulmonary function testing. - History of alcohol or substance abuse that, in the opinion of the investigator, may be of clinical significance. - Unlikeliness to comply with the protocol or inability to understand the nature, scope, and possible consequences of the study. - Inability to correctly use the sham device. |

**Abbreviations:** GOLD, Global Initiative for Chronic Obstructive Lung Disease

**Supplementary Table 2**  Patients’ Respiratory Medication

| **Subject nº** | **Respiratory medication** |
| --- | --- |
| **1**  **2**  **3**  **4**  **5**  **6**  **7**  **8**  **9**  **10** | Anoro 55/22 μg Ellipta and Qvar 100 μg Autohaler  Anoro 55/22 μg Ellipta  Spiolto 2.5 μg Respimat  Ultibro 85/43 μg Breezhaler  Spiriva 18 μg Handihaler and Seretide Discus 50/500 μg  Spiriva 18 μg Handihaler and Inuvair 100/6 μg MDI  Spiriva 2,5 μg Respimat and Seretide MDI 250/25 μg  Spiriva 18 μg Handihaler and Seretide MDI 250/25 μg  Spiriva 2.5 μg Respimat and Symbicort 160/4.5 μg DPI  Spiriva 2,5 μg Respimat and Inuvair 100/6 μg Nexthaler |

**Abbreviations:** MDI, Metered Dose Inhaler; DPI, Dry Powder Inhaler

**Supplementary Table 3**  Clinical Parameters (mean±SD) before and after (15±3 days) Aerobika® Treatment

| **Parameter** | **Before** | **After** | **p (Linear mix effect model)** |
| --- | --- | --- | --- |
| **FVC (L)** | 3.52±1.16 | 3.54±1.25 | 0.717 |
| **FEV1 (L)** | 1.58±0.71 | 1.59±0.75 | 0.860 |
| **PEF (L/s)** | 4.92±1.78 | 4.68±1.76 | 0.071 |
| **TLC (L)** | 6.30±1.02 | 6.33±0.99 | 0.639 |
| **Deposition (% of labelled dose) - TOTAL** | 3.35±3.24 | 3.39±3.32 | 0.945 |
| **Deposition (% of labelled dose) - DISTAL** | 1.03±0.97 | 1.06±1.03 | 0.918 |
| **Deposition (% of labelled dose) - PERIPHERAL** | 2.31±2.49 | 2.32±2.46 | 0.944 |

**Abbreviations**: SD, standard deviation; FVC, forced vital capacity; FEV1, forced expiratory volume in one second; PEF, peak expiratory flow; TLC, total lung capacity.
